# Supplementary material for: Templating synthesis of hollow CuO polyhedron and its application for nonenzymatic glucose detection
Source: Royal Society of Chemistry journal article supplement (doi:10.1039/c4ta00703d), 2014-01-01
Supplement: c4ta00703d1.pdf [file c4ta00703d1.pdf]

## Electronic Supplementary information (ESI)

### Templating synthesis of hollow CuO polyhedron and its application for nonenzymatic glucose detection

Chuncai Kong, Linli Tang, Xiaozhe Zhang, Shaodong Sun, Shengchun Yang, Xiaoping Song and Zhimao Yang\*

*School of Science, MOE Key Laboratory for Non-Equilibrium Synthesis and Modulation of Condensed Matter, State Key Laboratory for Mechanical Behavior of Materials, Xi'an Jiaotong University, Collaborative Innovation Center of Suzhou Nano Science and Technology, Xi'an 710049, ShaanXi, People's Republic of China.*

\*Author to whom correspondence should be addressed; E-mail: zmyang@mail.xjtu.edu.cn

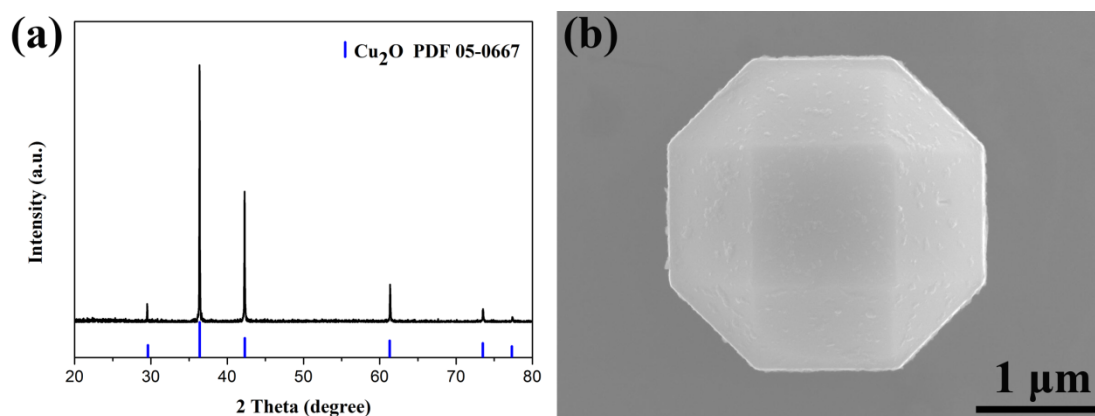

**Fig. S1** XRD pattern and FESEM images of the 26-facet Cu<sub>2</sub>O.
